# Supplementary material for: Myeloid DAP12-associating lectin (MDL)-1 regulates synovial inflammation and bone erosion associated with autoimmune arthritis
Source: PubMed Central journal article supplement — J Exp Med. 2010 Mar 15;207(3):579–89. doi: 10.1084/jem.20090516 (PMC2839155; doi:10.1084/jem.20090516), 2010-03-15
Supplement: supp_jem.20090516_JEM_20090516_sm.pdf [file supp_jem.20090516_JEM_20090516_sm.pdf]

## SUPPLEMENTAL MATERIAL

Joyce-Shaikh et al., <http://www.jem.org/cgi/content/full/jem.20090516/DC1>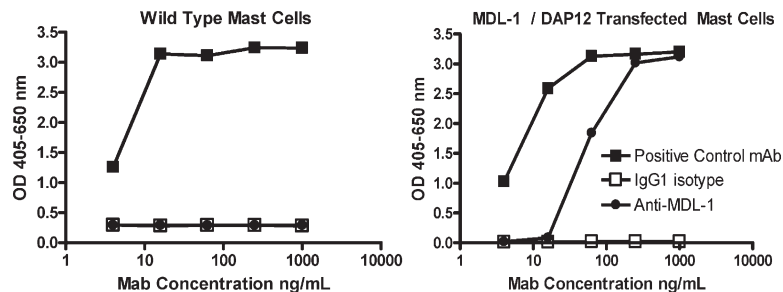

**Figure S1.** A mast cell degranulation assay was performed to demonstrate the agonistic activity of anti-MDL-1 mAb. DT830 is a mast cell line in which MDL-1 is transduced. These cells were stimulated with anti-MDL-1 (clone DX163) or isotype control antibodies. Anti-MDL-1, but not isotype control, induced mast cell degranulation in MDL-1 transfectants. Clone DX89 (anti-CD200R), a potent mast cell degranulating antibody, was utilized as a positive control.

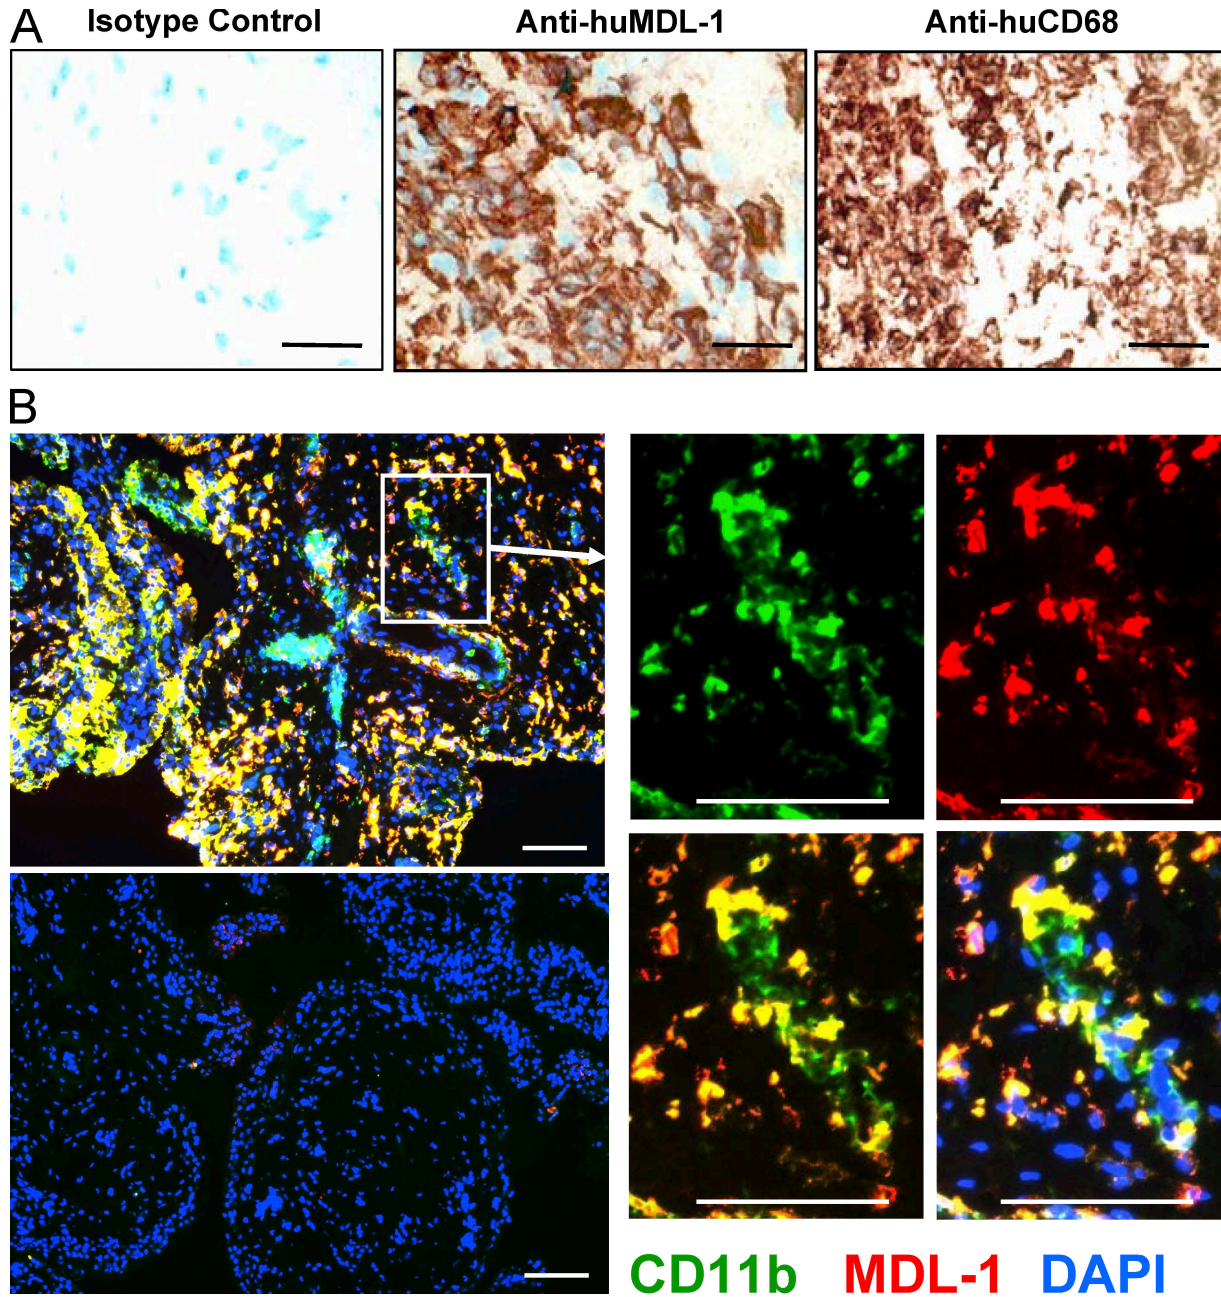

**Figure S2. CD68<sup>+</sup> CD11b<sup>+</sup> macrophages in human RA joints express MDL-1.** (A) MDL-1 expression is elevated in human arthritis tissues. Serial sections from RA synovial tissues were stained by IHC using anti-hMDL-1 (clone DX246) or anti-CD68. Staining patterns revealed extensive MDL-1 expression on a subset of CD68 positive macrophages in the area of pannus formation and tissue damage. Results are representative of four patient samples. Bar, 33  $\mu$ m. (B; top left) two-color fluorescent immunostaining of human RA inflamed synovium demonstrate colocalization of MDL-1(DX246) to a major subset of CD11b<sup>+</sup> cells. (bottom left) DAPI nuclei stain (blue) plus FITC and PE-conjugated isotype controls demonstrates virtually no background staining. (right) Higher magnification of area boxed in white rectangle. Note that most, but not all, of the CD11b<sup>+</sup> cells (green) co-express MDL-1 (red) as depicted in the merged immunofluorescent image (yellow). Results are representative of four patient samples. Bar, 400  $\mu$ m.

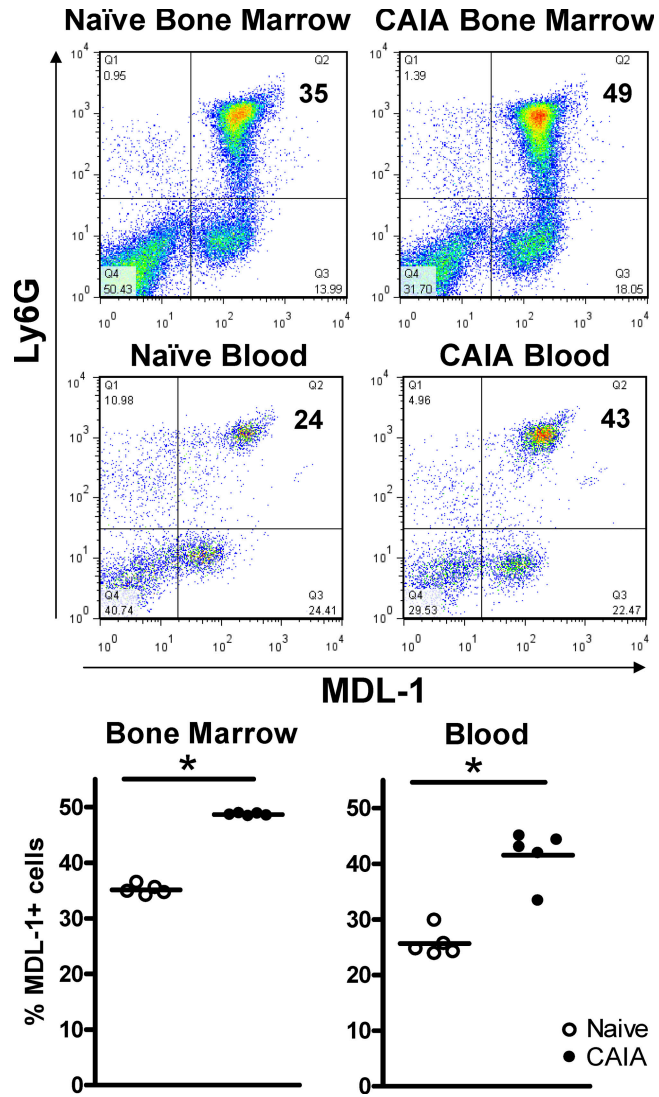

**Figure S3. Proportion of MDL-1<sup>+</sup> cells increased during CAIA in bone marrow and peripheral blood.** Cells were isolated 7 d after induction of CAIA for flow cytometric analysis. CD11b<sup>+</sup>/ Ly6G<sup>+</sup> bone marrow and blood leukocytes were compared for MDL-1 expression.

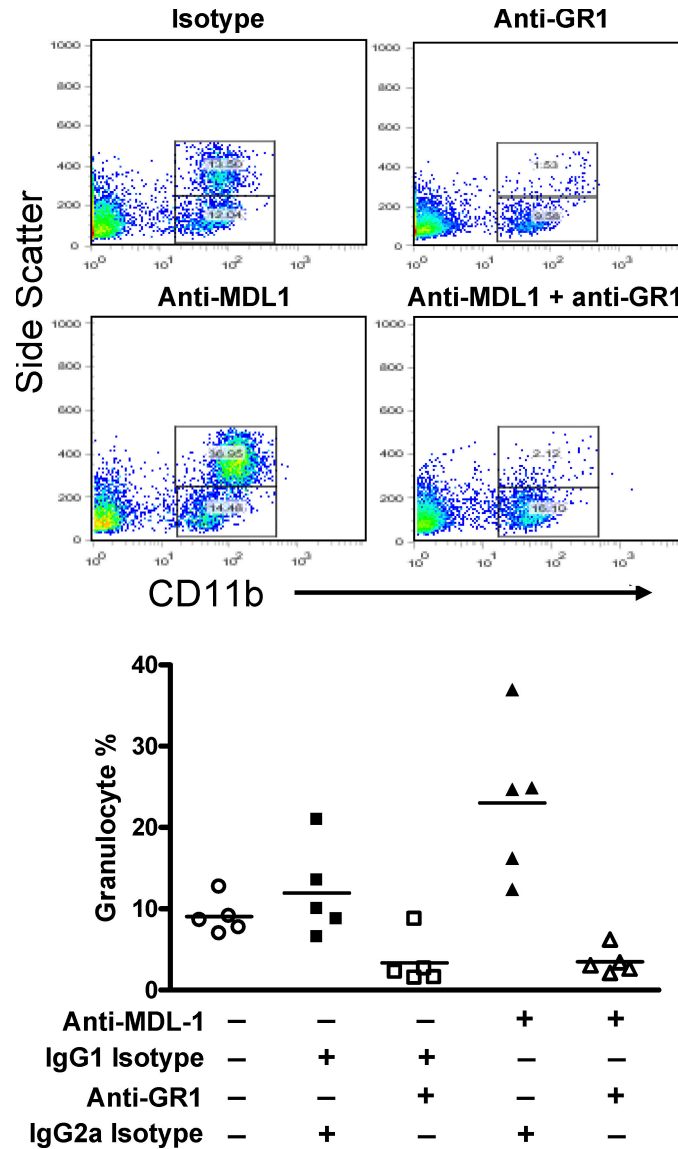

**Figure S4.** Anti-GR1 depletion was initiated at day -1 in B10.RIII mice and CAIA was induced on day 0. Blood analysis was performed on day six after disease induction. After red cell lysis, cells were stained with CD11b and analyzed by flow cytometry. Mice that received anti-GR1 antibody showed depletion of CD11b<sup>+</sup> side scatter<sup>Hi</sup> granulocyte population.

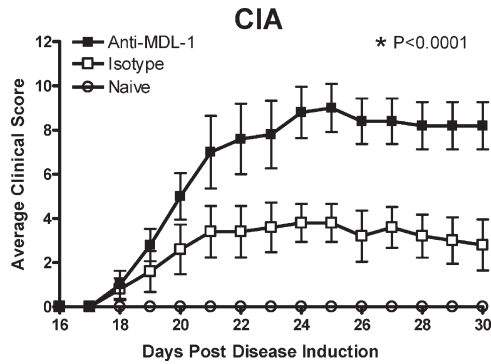

**Figure S5. MDL-1 activation enhanced T cell- and myeloid cell-dependent arthritis.** B10RIII mice were immunized with bovine type II collagen emulsified in CFA at day 0 to induce collagen-induced arthritis. Anti-MDL-1 agonist (clone DX163) was given on day 18 of immunization. Statistical significance was determined by ANOVA analysis. Results are representative of two studies.

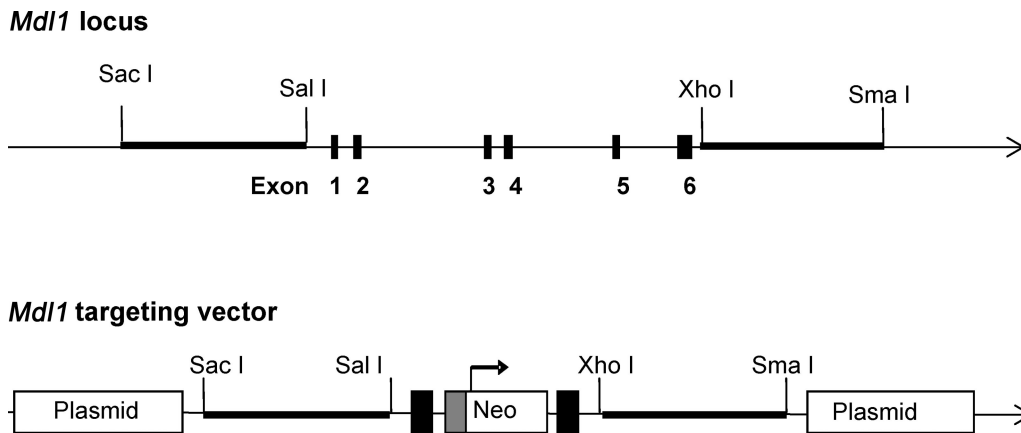

**Figure S6.** *Mdl1*<sup>-/-</sup> mice were generated by homologous recombination using the above targeting vector in C57BL/6 ES cells.

|    | Naive WT     | WT AIA | Naive DAP12 | DAP12 AIA | Naive MDL-1 | MDL-1 AIA |      |
|----|--------------|--------|-------------|-----------|-------------|-----------|------|
| 1  | MCP-1        | 28     | 336         | 15        | 53          | 12.8      | 40   |
| 2  | MMP9         | 128    | 762         | 207       | 221         | 171       | 249  |
| 3  | LIX          | 12     | 34          | 11        | 6           | 8         | 3    |
| 4  | IL-6         | 5      | 136         | 8         | 30          | 10        | 7    |
| 5  | IL1b         | 26     | 578         | 55        | 131         | 55        | 47   |
| 6  | RANKL        | 6      | 88          | 8         | 25          | 6         | 15   |
| 7  | TIMP-1       | 1257   | 16925       | 1184      | 4386        | 1054      | 2058 |
| 8  | DAP12        | 1040   | 3563        | 0.8       | 0.3         | 1503      | 1547 |
| 9  | MDL-1        | 56     | 118         | 68        | 79          | 0.9       | 0.2  |
| 10 | TRAP         | 471    | 3025        | 712       | 1188        | 610       | 1291 |
| 11 | OPN          | 5617   | 13925       | 4911      | 6784        | 3942      | 5725 |
| 12 | c-fos        | 15     | 603         | 27        | 139         | 47        | 265  |
| 13 | CD14         | 65     | 207         | 26        | 125         | 23        | 89   |
| 14 | CD11b        | 39     | 329         | 43        | 186         | 55        | 117  |
| 15 | RANK         | 10     | 118         | 24        | 52          | 8         | 45   |
| 16 | CTSK         | 86     | 1198        | 112       | 384         | 137       | 463  |
| 17 | c-fms        | 46     | 109         | 47        | 43          | 41        | 43   |
| 18 | calcitonin R | 0.6    | 3           | 0.2       | 0.2         | 0.2       | 0.2  |
| 19 | NFATc1       | 40     | 332         | 34        | 129         | 46        | 168  |
| 20 | TNF          | 9      | 84          | 18        | 10          | 8         | 6    |

**Figure S7. Hind paws from naïve and arthritic mice were prepared for gene expression analysis.** Ubiquitin levels were used to normalize the data by the  $\Delta - \Delta$  Ct method, using the mean cycle threshold (Ct) value and the genes of interest for each sample (Ct ubiquitin - Ct gene of interest)  $\times 10^4$  was used to obtain the normalized values. This result corresponds to the heat map shown in Fig. 3B.

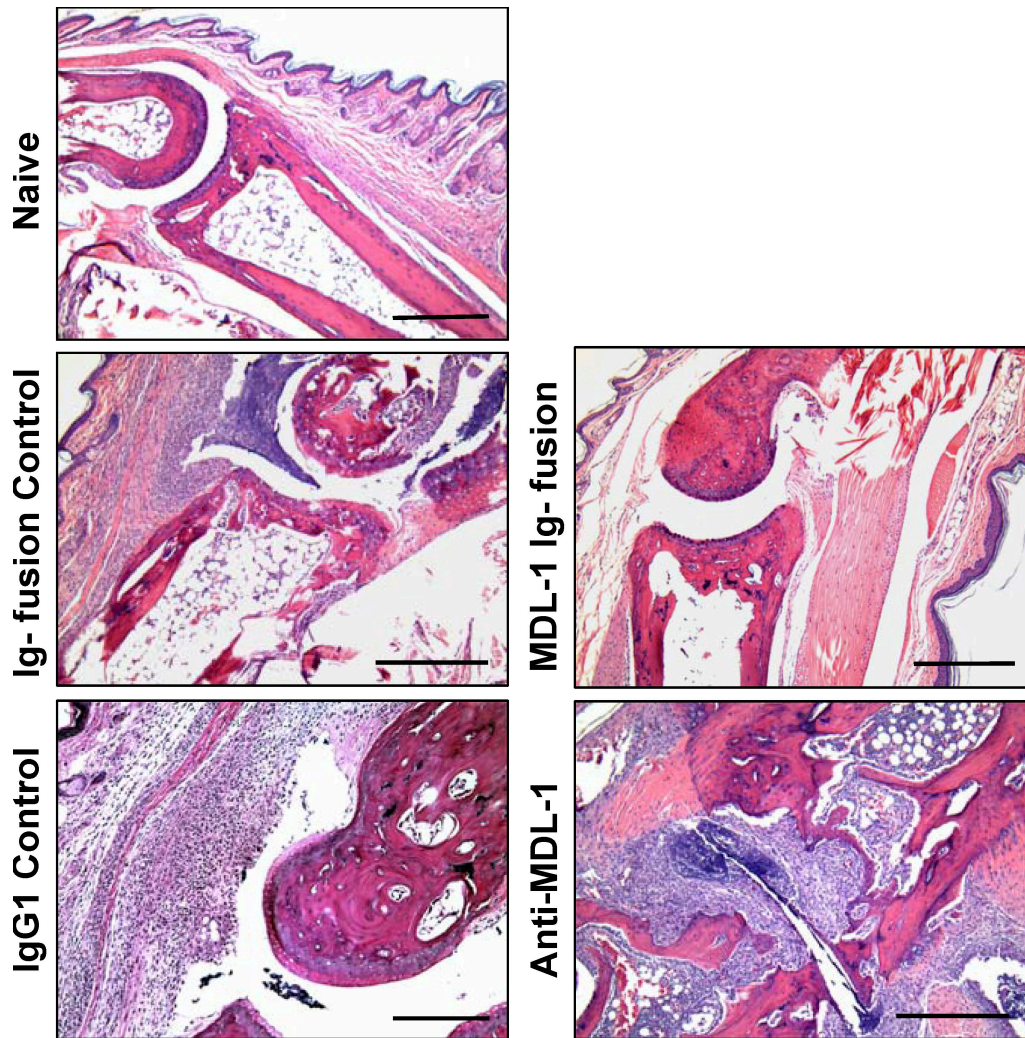

**Figure S8.** Representative H&E stained micrographs of metatarsal-phalange joints from the study shown in Fig. 3D. Tissue samples were taken at day 11 of the experiment. MDL-1-Ig fusion protein treatment group showed less damage as compared to controls. Bar, 400 μm.
